# Supplementary material for: Molecular Subtypes of Pulmonary Large-cell Neuroendocrine Carcinoma Predict Chemotherapy Treatment Outcome
Source: Oxford University Press journal article supplement (doi:10.1158/1078-0432.ccr-17-1921), 2017-10-24
Supplement: 10780432ccr171921-sup-185856_2_supp_4311661_sxbdsw.docx [file 10780432ccr171921-sup-185856_2_supp_4311661_sxbdsw.docx]

| Table S1. Evaluation of homozygous deletions by FISH in LCNEC tumors with *RB1*-wildtype and lost RB1 protein expression (n=20). | | |
| --- | --- | --- |
| *Case number* | *Dominant pattern observed* | *Homozygous deletion observed* |
| 56 | 2:2 | No |
| 13 | 2:2 | No |
| 18 | 2:2 | No |
| 123 | 1:1 and 2:2 | No |
| 125 | NA | NA |
| 157 | 2:2 | No |
| 174 | 2:2 | No |
| 207 | 1:2 | No |
| 222 | 1:1 | No |
| 327 | NA | NA |
| 297 | 1:1 | No |
| 341 | NA | NA |
| 372 | 1:1 and 2:2 | No |
| 380 | 2:2 | No |
| 381 | 2:2 | No |
| 2002 | 1:1 | No |
| 61 | NA | NA |
| 144 | 1:1 | No |
| 229 | 3:3 | No |
| 367 | 1:1 | No |
| *Abbreviations:* FISH, Fluorescence in situ hybridization; NA, not available. | | |
